# Supplementary material for: Cranial findings detected by second‐trimester ultrasound in fetuses with myelomeningocele: a systematic review
Source: PubMed Central journal article supplement (PMC8436766; doi:10.1111/1471-0528.16496), 2021-01-03
Supplement: BJO-128-366-s010.pdf [file BJO-128-366-s010.pdf]

**Table S1.** Characteristics of included studies

| Study                            | Study design                             | Primary outcome                                                                                                                                                                         | Population                     | Gestational age at examination | Chromosomal abnormalities exclusion | Additional anomalies exclusion | Ultrasound machine       | Ultrasound probe                                    | Level of sonographer |
|----------------------------------|------------------------------------------|-----------------------------------------------------------------------------------------------------------------------------------------------------------------------------------------|--------------------------------|--------------------------------|-------------------------------------|--------------------------------|--------------------------|-----------------------------------------------------|----------------------|
| <b>Appasamy, 2006 (21)</b>       | Retrospective cohort                     | Compare prenatal and postnatal US/MRI findings on head signs and lesion levels in fetuses with MMC                                                                                      | Prenatal & postnatal diagnosis | 16-23 weeks                    | NA                                  | NA                             | Varies                   | NA                                                  | NA                   |
| <b>Bahlmann, 2015 (22)</b>       | Cross-sectional (retrospective analysis) | Determine the incidence of secondary cranial signs in fetuses with MMC                                                                                                                  | Prenatal diagnosis             | 18-23 weeks                    | Yes                                 | NA                             | Machines used below†     | NA                                                  | US specialists       |
| <b>Callen, 2008 (30)</b>         | Cross-sectional (retrospective analysis) | Determine the incidence of pointed deformity of occipital horns of lateral ventricles in fetuses with MMC                                                                               | Prenatal diagnosis             | 17-34 weeks                    | NA                                  | NA                             | NA                       | 2-4-MHz vector /2-6-MHz curved array transducer     | Single US specialist |
| <b>Callen, 2009 (27)</b>         | Cross-sectional (retrospective analysis) | Determine the incidence of prominent beaking and elongated tectum in fetuses with MMC                                                                                                   | Prenatal diagnosis             | 17-34 weeks                    | NA                                  | NA                             | NA                       | 2-4-MHz vector /2-6-MHz curved array transducer     | Single US specialist |
| <b>Cuppen, 2015 (20)</b>         | Cross-sectional (retrospective analysis) | Assess fetal BPD and HC during second trimester in fetuses with MMC                                                                                                                     | Prenatal diagnosis             | 16-26 weeks                    | NA                                  | NA                             | NA                       | NA                                                  | US specialists       |
| <b>D'Addario, 2008 (17)</b>      | Cross-sectional (retrospective analysis) | Compare diagnostic accuracy of lemon sign, ventriculomegaly, effaced cisterna magna, small cerebellum, small clivo-supraoccipital angle and spinal defect in detecting fetuses with MMC | Prenatal diagnosis             | 18-28 weeks                    | NA                                  | NA                             | NA                       | NA                                                  | NA                   |
| <b>Filly, 2010 (32)</b>          | Cross-sectional (retrospective analysis) | Describe the abnormal more posterior position of occipital horn of the lateral ventricle in fetuses with MMC                                                                            | Prenatal diagnosis             | 18-30 weeks                    | NA                                  | NA                             | NA                       | 2-4-MHz vector /2-6-MHz curved array transducer     | NA                   |
| <b>Fleurke-Rozema, 2014 (23)</b> | Retrospective cohort                     | Assess the impact of mid-trimester ultrasound on pregnancy outcomes of MMC                                                                                                              | Prenatal & postnatal diagnosis | 18-24 weeks                    | NA                                  | NA                             | NA                       | NA                                                  | NA                   |
| <b>Ghi, 2006 (24)</b>            | Cross-sectional (retrospective analysis) | Identify criteria important to differentiate closed from MMC                                                                                                                            | Prenatal & postnatal diagnosis | 16-34 weeks                    | NA                                  | Yes                            | Varies                   | NA                                                  | NA                   |
| <b>Maurice, 2020 (28)</b>        | Retrospective cohort                     | To examine cerebral anomalies related to MMC besides Chiari II malformation                                                                                                             | Prenatal & postnatal diagnosis | 20-26 weeks                    | Yes                                 | Yes                            | Canon Aplio 400 unit     | Vector and curved array or transvaginal transducer  | Single US specialist |
| <b>Munoz, 2019 (25)</b>          | Retrospective cohort                     | Identify maternal and fetal characteristics associated with pregnancy outcomes of MMC                                                                                                   | Prenatal diagnosis             | 20.3 weeks*                    | Yes                                 | Yes                            | NA                       | NA                                                  | NA                   |
| <b>Oliver, 2019 (29)</b>         | Retrospective cohort                     | Determine the effect of presence/absence of MMC sac on fetall talipes                                                                                                                   | Prenatal diagnosis             | 18-24 weeks                    | NA                                  | NA                             | NA                       | NA                                                  | US specialists       |
| <b>Ramin, 2002 (25)</b>          | Cross-sectional (retrospective analysis) | Assess the association between prenatal ultrasound markers and postnatal neurological outcomes in fetuses with MMC                                                                      | Prenatal diagnosis             | 19-22 weeks                    | Yes                                 | Yes                            | Toshiba SSA-270, ATL5000 | 3.75-5.2-MHz transducer                             | NA                   |
| <b>Wax, 2009 (31)</b>            | Cross-sectional (retrospective analysis) | Determine the incidence of pointed deformity of occipital horns of lateral ventricles in fetuses with and without MMC                                                                   | Prenatal diagnosis             | 19.2 weeks*                    | NA                                  | NA                             | NA                       | NA                                                  | US specialists       |
| <b>Wong, 2009 (33)</b>           | Cross-sectional (retrospective analysis) | Determine the incidence of interhemispheric arachnoid cysts in fetuses with MMC                                                                                                         | Prenatal diagnosis             | 17-35 weeks                    | NA                                  | NA                             | NA                       | 2- 4-MHz vector or 2- 6-MHz curved array transducer | Single US specialist |

Abbreviations: MMC, myelomeningocele; BPD, biparietal diameter; HC: head circumference; NA, data not available; US ultrasound

†Combison 330/530D MT, Voluson730 Expert/E8, Sonoace Accuvix, Hitachi EUB 6500, Siemens Elegra, Acuson Sequoia, GE Logiq 9, HDI 5000 Sono CT, Philips IU22, Aloka Prosound SSD, Aplio XG/500

\*Average GA at diagnosis

**Table S2.** Quality appraisal for cohort study assessed by Newcastle-Ottawa scale

| Study name                | Selection 1 | Selection 2 | Selection 3 | Selection 4 | Comparability | Outcome 1 | Outcome 2 | Outcome 3 | Summary |
|---------------------------|-------------|-------------|-------------|-------------|---------------|-----------|-----------|-----------|---------|
| Appasamy, 2006 (47)       | 1           | 1           | 1           | 1           | 0             | 1         | 1         | 1         | Poor    |
| Fleurke-Rozema, 2014 (49) | 1           | 1           | 1           | 1           | 0             | 1         | 1         | 1         | Poor    |
| Maurice, 2020             | 1           | 1           | 1           | 0           | 1             | 1         | 1         | 1         | Good    |
| Munoz, 2019 (52)          | 1           | 1           | 1           | 1           | 0             | 1         | 1         | 1         | Poor    |
| Oliver, 2019 (53)         | 1           | 1           | 1           | 1           | 1             | 1         | 1         | 1         | Good    |

**Table S3.** Quality appraisal for cross-sectional study assessed by modified Newcastle-Ottawa scale

| Study name           | Selection 1 | Selection 2 | Selection 3 | Selection 4 | Comparability | Outcome 1 | Outcome 2 | Summary      |
|----------------------|-------------|-------------|-------------|-------------|---------------|-----------|-----------|--------------|
| Bahlmann, 2015 (26)  | 1           | 0           | 1           | 2           | 0             | 2         | 1         | Good         |
| Callen, 2008 (30)    | 1           | 0           | 1           | 2           | 0             | 1         | 1         | Satisfactory |
| Callen, 2009 (27)    | 1           | 0           | 1           | 2           | 0             | 1         | 1         | Satisfactory |
| Cuppen, 2015 (20)    | 1           | 0           | 1           | 2           | 0             | 2         | 1         | Good         |
| D'Addario, 2008 (18) | 1           | 0           | 1           | 2           | 0             | 2         | 0         | Satisfactory |
| Filly, 2010 (32)     | 1           | 0           | 1           | 2           | 1             | 1         | 1         | Good         |
| Ghi, 2006 (51)       | 1           | 0           | 1           | 2           | 0             | 2         | 0         | Satisfactory |
| Ramin, 2002 (40)     | 1           | 0           | 1           | 2           | 0             | 2         | 1         | Good         |
| Wax, 2009 (31)       | 1           | 0           | 1           | 2           | 2             | 1         | 1         | Good         |
| Wong, 2009 (33)      | 1           | 0           | 1           | 2           | 0             | 1         | 0         | Satisfactory |
