# Supplementary material for: Cranial findings detected by second‐trimester ultrasound in fetuses with myelomeningocele: a systematic review
Source: PubMed Central journal article supplement (PMC8436766; doi:10.1111/1471-0528.16496), 2021-01-03
Supplement: BJO-128-366-s011.pdf [file BJO-128-366-s011.pdf]

**Appendix S1.** Search strategy.

| <b>Search strategy (MESH terms and keywords)</b>                                                                                                                                                                                                                                                                                                                                                                                                                                                                                                                                                               |
|----------------------------------------------------------------------------------------------------------------------------------------------------------------------------------------------------------------------------------------------------------------------------------------------------------------------------------------------------------------------------------------------------------------------------------------------------------------------------------------------------------------------------------------------------------------------------------------------------------------|
| “spinal dysraphism” [MeSH] OR “arnold-chiari malformation” [MeSH] OR “meningomyelocele” [MeSH] OR spinal dysraphism OR spina bifida OR Arnold-chiari malformation OR meningomyelocele<br>AND<br>“ultrasonography, prenatal/” [MeSH] OR ultrasound OR sonography OR ultrasonography OR (2D or 3D or 4D) adj2 ultrasound OR (2D or 3D or 4D) adj2 sonography OR (2D or 3D or 4D) adj2 ultrasonography<br>AND<br>“pregnancy, high-risk” [MeSH] OR “pregnancy trimester, second/ or pregnancy trimester, third/” [MeSH] OR “fetus” [MeSH] OR “Prenatal care” [MeSH] or pregnan* adj4 trimester OR f?etal OR f?etus |

**Appendix S2.** Characteristics of included studies and results.

| <b>Characteristics of included studies</b>                                                                                                                                                                                                                                                                                           |
|--------------------------------------------------------------------------------------------------------------------------------------------------------------------------------------------------------------------------------------------------------------------------------------------------------------------------------------|
| <b>Participant characteristics</b> <ul style="list-style-type: none"><li>- Maternal age</li><li>- Gestational age at the time of evaluation</li><li>- Associated anomalies or chromosomal abnormalities</li><li>- Diagnostic confirmation (availability of postnatal examination or post-termination of pregnancy autopsy)</li></ul> |
| <b>Technical aspects</b> <ul style="list-style-type: none"><li>- Ultrasound machine</li><li>- Ultrasound probe</li><li>- Levels of experience and numbers of sonographers</li></ul>                                                                                                                                                  |
| <b>Study methodology</b> <ul style="list-style-type: none"><li>- First author name</li><li>- Title of the paper</li><li>- Year of publication</li><li>- Study design (cohort/cross-sectional studies/randomised control trial)</li><li>- Patient enrolment (selective or non-selective)</li></ul>                                    |
| <b>Study results</b> <ul style="list-style-type: none"><li>- Definition of detected intra-cranial findings</li><li>- Total number of examination and crude number of each intra-cranial finding</li></ul>                                                                                                                            |
